# Supplementary material
Source: HighWire-hosted journal article supplement (https://bmjopen.bmj.com/content/11/8/e051381)
Supplement: inline-supplementary-material-5 [file inline-supplementary-material-5.xlsx]

## Sheet: Sheet1
Section 2
Area of Footwear	Round 1		Round 2		Round 3
Topline	Design Charecteristic "Topline Extension"	% Frequency of ≥Agree	Design Charecteristic "Topline Extension"	Relative %Frequency
	"Extended topline height above the ankle"	58.82	Original Round1 "Extended topline height above the ankle"	6.66667
			Modified Round 2: "The topline extension should come in an optional range both above and below the ankle dependent on the patient's ability and needs."	93.3333
			Modified Round 2: "The topline should not be extended above the ankle"	0
			Purpose of Design "Topline Extension"	% Frequency of ≥Agree	Purpose of Design "Topline Extension"	% Frequency of ≥Agree
			"An extended topline height increases proprioception input at the rearfoot and ankle"	40.67	Modified Round 3: "An extended topline height may increase proprioception input at the rearfoot and ankle. "	68.75
			"An extended topline height assists heel counter leverage to resist frontal plane movement of the rearfoot and ankle "	53.33	Modified Round 3: "An extended topline height may assist heel counter leverage to resist frontal plane movement of the rearfoot and ankle."	81.25
			Adverse Effect of Design: Topline Extension	% Frequency of ≥Agree	Adverse Effect of Design: Topline Extension	% Frequency of ≥Agree
			"An extended topline height may reduce sagittal plane power generation at the ankle."	33.33	Orginal Round 2: "An extended topline height may reduce sagittal plane power generation at the ankle."	62.5
	Design Charecteristic "Collar Material "	% Frequency of ≥Agree	Design Charecteristic "Collar Material"	% Frequency of ≥Agree	Design Charecteristic "Collar Material"	% Frequency of ≥Agree
	"Topline Should have a padded Collar"	88.4
			"The foam padded collar should be covered with low shear material."	66.67	Original Round 2 "The foam padded collar should be covered with low shear material."	68.75
			Purpose of Design "Collar Material"	% Frequency of ≥Agree	Purpose of Design "Collar Material"	% Frequency of ≥Agree
			Foam Padding reduces compression to lower limb anatomy from an extended topline height	53.33	Modified Round 3: "Foam Padding may reduce compression to lower limb anatomy from an extended topline height."	81.25
	Design Charecteristic "Collar Contouring "	% Frequency of ≥Agree	Design Charecteristic "Collar Contouring "	Relative %Frequency
	"Topline Collar should be contoured to the supra or infra malleoli region dependent on topline height"	76.47
	"Topline should have a Collar contoured to the Achilles tendon"	70.59	Original Round 1: "Topline should have a Collar contoured to the Achilles tendon"	80
			Modified Round2: "Collar contoured to Achilles tendon is not a desired design characteristic."	20
			Purpose of Design "Collar Contouring "	% Frequency of ≥Agree	Purpose of Design "Collar Contouring "	% Frequency of ≥Agree
			"Contouring of topline reduces shear and compression stress to the ankle region"	60	Modified Round 3: "Contouring of topline may reduce shear and compression stress to the ankle region."	93.75
			"Contouring the collar to the Achilles tendon reduces shear and compression to the tendon."	60	Modified Round 3: "Contouring the collar to the Achilles tendon may reduce shear and compression to" the tendon.	81.25
	Design Charecteristic "Collar Pull Tab "	% Frequency of ≥Agree	Design Charecteristic "Collar Pull Tab "	Relative %Frequency	Design Charecteristic "Collar Pull Tab "	Relative %Frequency
	"Topline should have a Pull tab to back of collar"	52.94	Original Round 1: "Topline should have a Pull tab to back of collar"	53.3333	Original Round 1: Topline should have a Pull tab to back of collar	75
			Modified Round 2: "Pull tab to back of collar is not a desired design characteristic"	46.6667	Orginal Round 2:Pull tab to back of collar is not a desired design characteristic	25
			Purpose of Design "Collar Pull Tab "	% Frequency of ≥Agree	Purpose of Design "Collar Pull Tab "	% Frequency of ≥Agree
			A collar pull tab aids the child in donning the shoe	33.33	Modified Round 3: A collar pull tab may aid the child or those offering assistance in donning the stability shoe	75
Upper	Design Charecteristic "Upper material"	% Frequency of ≥Agree	Design Charecteristic "Upper material"	Relative %Frequency
	"The Upper should be constructed of leather"	52.94	Original Round 1: "Upper should be constructed of leather"	0
			Modified Round 2: "Optional range of upper material to include; leather, breathable material and wipeable material"	100
			Purpose of Design "Upper material"	% Frequency of ≥Agree	Purpose of Design "Upper material"	% Frequency of ≥Agree
			"Leather adapts to foot structures over time"	73.33	Modified Round 3: "Leather may adapt to foot structures over time dependent on the tensile strength of the leather."	93.25
			"Leather enhances material stiffness of the footwear"	53.33	Modified Round 3:"Leather may enhance material stiffness of the footwear dependent on the tensile strength of the leather."	93.25
	Design Charecteristic "Tongue Extension"	% Frequency of ≥Agree	Design Charecteristic "Tongue Extension"	Relative %Frequency	Design Charecteristic "Tongue Extension"	Relative %Frequency
	"Tongue in line with topline"	47.06	Original Round 1" Tongue in line with topline"	0
	"Tongue extended above topline"	47.06	Original Round 1" Tongue extended above topline"	33.3333	Original Round 1" Tongue extended above topline"	6.25
			Modified Round 2 "Tongue length optional dependent on patient's preference and manual dexterity "	66.6667	Orginal Round 2 "Tongue length optional dependent on patient's preference and manual dexterity "	95.75
			Purpose of Design" Tongue Extension"	% Frequency of ≥Agree	Purpose of Design" Tongue Extension"	% Frequency of ≥Agree
			"Tongue in line with topline is to minimise irritation to the anterior aspect of the ankle"	33.33	Orginal Round 2 "Tongue in line with topline is to minimise irritation to the anterior aspect of the ankle"	62.5
			"Tongue extended above topline allows for comfort with lacing"	60	Original Round 2 "Tongue extended above topline allows for comfort with lacing"	81.25
			"Tongue extended above topline allows the wearer to minimise slippage of the tongue under the fastenings during wear'	60	Original Round 2 "Tongue extended above topline allows the wearer to minimise slippage of the tongue under the fastenings during wear'	81.25
			Design Charecteristic "Tongue Loop"	% Frequency of ≥Agree
			"Slit or loop in tongue for fastening to minimise tongue slippage"	86.67
			Design Charecteristic "High Topped Sandals"	% Frequency of ≥Agree	Design Charecteristic "High Topped Sandals"	% Frequency of ≥Agree
			"High topped sandals to be offered as an option for stability footwear ranges for warm weather"	53.33	Original Round 2 "High topped sandals to be offered as an option for stability footwear ranges for warm weather"	81.25
			Design Charecteristic "Internal Seams"	% Frequency of ≥Agree
			"Ergonomic consideration of internal seams to reduce skin irritation"	100
Fastenings and Facings	Design Charecteristic "Fastenings" The fastening should have the following characteristics:	Relative %Frequency	Design Charecteristic "Fastenings" The fastening should have the following characteristics:	Relative %Frequency
	Velcro	23.5294	Original Round 1 Lace	0
	Lace	5.88235	Original Round 1 "Velcro"	6.67
	No Prefernce	17.6471	Original Round 1 "No Preference"	0
	Other	52.9412	"Optional dependent on patient's ability and desired goal (e.g. velcro for limited hand dexterity, lace for greater stability)"	93.33
			Purpose of Design " Fastening"	% Frequency of ≥Agree	Purpose of Design " Fastening"	% Frequency of ≥Agree
			Velcro fastenings: Assists independence with limited hand dexterity in donning and doffing	93.33
			"lace fastenings: Enhances stability through potential firmer grip to contours of the foot"	73.33	Modified Round 3: "lace fastenings: Enhances stability through potential firmer grip to the contours of the foot"	81.25
			Design Charecteristic "Fastening Side Zip"	% Frequency of ≥Agree	Design Charecteristic "Fastening Side Zip"	% Frequency of ≥Agree
			"Side zip lace combination fastening"	60	Original Round 2 "Side zip lace combination fastening"	68.75
	Design Charecteristic "Facing Extension" The facings should have the following characteristics:	Relative %Frequency	Design Charecteristic "Facing Extension" The facings should have the following characteristics:	Relative %Frequency
	Facings extended to just behind the toe box	47.0588	Original Round 1 "Facings extended to just behind the toe box"	6.66667
	Facings extended to the midfoot	17.6471	Original Round 1"Facings extended to the midfoot"	0
	No Prefernce	11.7647	Original Round 1 "No Preference"	0
	Other	23.5294	Optional dependent on patient's foot and ankle mobility or therapeutic goal (i.e. facings extended to toe box for ease of foot and ankle access, extended to midfoot for greater upper stability)	93.3333
			Purpose of Design "Facing Extension"	% Frequency of ≥Agree	Purpose of Design "Facing Extension"	% Frequency of ≥Agree
			"Facings extended to just behind the toe box allows greater access into the footwear for the child with limited foot and ankle range of motion"	93.33
			"Facing extended to the midfoot allows the upper to offer greater stability to the foot and ankle."	53.33	Original Round 1: "Facing extended to the midfoot allows the upper to offer greater stability to the foot and ankle."	87.5
			Design Charecteristic "Facings"	% Frequency of ≥Agree
			"The gap between facings should allow an adequate range of fastening adjustment."	86.67
Heel Counter	Design Charecteristic "Heel Counter Extension"	% Frequency of ≥Agree	Design Charecteristic "Heel Counter Extension"	Relative %Frequency
	"Heel counter/stiffener extended to midfoot"	70.59	Modfied Round 2:"Heel counter/stiffener extended to the midfoot only"	13.3333
	"Heel counter/stiffener height extended towards topline."	47.06	Modfied Round 2: "Heel counter/stiffener extended towards the topline only"	0
			Modified Round 2: "Heel counter stiffener, extended to the midfoot and towards topline"	6.66667
			Modified Round 2: "Optional range of heel counter extensions dependent on therapeutic need and the patient's foot and ankle anatomy"	80
			Purpose of Design "Heel Counter Extension"	% Frequency of ≥Agree	Purpose of Design "Heel Counter Extension"	% Frequency of ≥Agree
			"Heel counter/stiffener extensions can enhance proprioception at the foot and ankle"	33.33	Modified Round 3: "Heel counter/stiffener extensions may enhance proprioception at the foot and ankle."	68.75
			"Heel counter/stiffener extension offers material stiffness to restrict frontal plane movements at the foot, ankle and midfoot dependent on the extension profile."	53.33	Modified Round 3: "Heel counter/stiffener extension offers material stiffness that may restrict frontal plane movements at the foot, ankle and midfoot dependent on the extension profile."	81.25
					Design Charecteristic " Heel Counter"	% Frequency of ≥Agree
					"Control of frontal plane movements of the foot and ankle at the heel counter area should also consider vertical ground reaction force contact area, through close contact between the plantar surface of the child's heel and the inner sole of the shoe. "	0.875
Heel	Design Charecteristic "Heel Width" The heel should have the following characteristics:	Relative %Frequency	Design Charecteristic "Heel Width" The heel should have the following characteristics:	Relative %Frequency	Design Charecteristic "Heel Width" The heel should have the following characteristics:	Relative %Frequency
	"Heel width in line with heel counter width"	23.5294	Orginal Round 1:"Heel width in line with heel counter width"	0
	"Heel width extended wider than heel counter width"	47.0588	Orginal Round 1: Heel width extended wider than heel counter width	40	Original Round 1: "Heel width extended wider than heel counter width"	25
	"No preference"	17.6471	Orginal Round 1: "No preference"	6.66667	Orginal Round 1 "No preference"	0
	"Other"	11.7647	Modified Round 2: Heel width extensions should be provided as an optional sole adaption with the heel width extension on standard stability footwear being no wider than the welted seam.	53.3333	Orginal Round 2: "Heel width extensions should be provided as an optional sole adaption with the heel width extension on standard stability footwear being no wider than the welted seam."	75
			Purpose of Design "Heel Width"	% Frequency of ≥Agree
			" Heel width extensions assist medial-lateral stability of the foot and ankle through an increased base of support"	86.67
			Design Charecteristic "Heel Pitch"	% Frequency of ≥Agree
			"Heel Pitch should not increase ankle instability"	86.67
			"Heel pitch should allow for adjunct orthotic therapy"	93.33
Inlay / Insock/ Insole	Design Charecteristic: "Removabe Inlay"	% Frequency of ≥Agree	Design Charecteristic: "Removabe Inlay"	% Frequency of ≥Agree
	"Stability footwear should come with a standard removable inlay."	88.23	"Removable Inlay should be thick enough to allow for a potential prescriptive foot orthoses."	100
	Design Charecteristic: "Insole Contouring"	% Frequency of ≥Agree	Design Charecteristic: "Insole Contouring"	Relative %Frequency	Design Charecteristic: "Insole Contouring"	Relative %Frequency
	"The inlay should be contoured to simulate the medial longitudinal arch. "	23.52	Orginal Round 1: "The inlay should be contoured to simulate the medial longitudinal arch"	13.3333	Modified Round 3 "The inlay should be be appropriately contoured to the medial longitudinal arch"	6.25
			Modified Round 2:"The inlay should be contoured to cup the heel but not the medial longitudinal arch"	33.3333	Modified Round 3 "The inlay should cup the child's heel to improve rearfoot fit but not be contoured to the medial longitudinal arch"	31.25
			Modified Round 2 "The inlay should be contoured to simulate the medial longitudinal arch and to cup the heel"	53.3333	Modified Round 3 "The inlay should cup the child's heel to improve rearfoot fit and be appropriately contoured to the medial longitudinal arch"	62.5
			Purpose of Design "Insole Contouring"	% Frequency of ≥Agree	Purpose of Design "Insole Contouring"	% Frequency of ≥Agree
			"An inlay contoured to cup the heel improves rearfoot fitting"	47.67	Modified Round 3 "An inlay contoured to cup the heel improves rearfoot fitting of the child's foot to the shoe"	81.25
Outsole	Design Charecteristic "Tread"	% Frequency of ≥Agree	Design Charecteristic "Tread"	Relative %Frequency
	"Outsole should have a deepened tread"	35.29	Original Round 1 "Outsole should have a deepened tread"	13.3333
			Modified Round 2 "The tread depth should come in an optional range dependent (on the ability of the child and the environment where the footwear is to be used.)"	86.6667
	Design Charecteristic "Material"	% Frequency of ≥Agree	Design Charecteristic "Material"	Relative %Frequency
	"Outsole should be made of hard wearing material"	64.72	Orginal Round 1: Ousole should be made hard-wearing material"	13.3333
			Modified Round 2 "Optional wear resilience of the sole material dependent on the age and ability of the patient."	86.6667
			Purpose of Design "Material"	% Frequency of ≥Agree
			"Hard wearing sole material will prolong the stability effect of the footwear by resisting wear patterns associated with gait pathologies."	86.6667
	Design Charecteristic "Flexibility" Degree of flexibility Ranked , 10 Firm - 1 Flexible	Relative %Frequency	Design Charecteristic "Flexibility"	Relative %Frequency
	10	5.88	The Degree of Flexibility of the Sole Unit: "The sole unit should come in a range of sole stiffness dependent on the patient's ability or the therapeutic goals, with flexibility of the sole focused at the MPJ area"	100
	9-8	0
	7	41.18
	6	23.53
	5	23.53
	4-2	0
	1	5.88	Other	0
			Design Charecteristic "Regional Stiffness of Outsole"	% Frequency of ≥Agree	Design Charecteristic "Regional Stiffness of Outsole"	% Frequency of ≥Agree
			"The sole unit should be stiffer at the midfoot and rearfoot to assist stability in these regions."	46.67	Orginal Round 2: "The sole unit should be stiffer at the midfoot and rearfoot to assist stability in these regions."	87.5
			Design Charecteristic "Regional Dimensions of Outsole"	% Frequency of ≥Agree	Design Charecteristic "Regional Dimensions of Outsole"	% Frequency of ≥Agree
			"Rearfoot to Forefoot width of the sole unit kept to lowest practical ratio to assist medial-lateral stability"	46.67	Modified Round 3 "The ground contact area ratio between the rearfoot and forefoot of the sole unit should be kept to the lowest practical ratio to assist medial-lateral stability"	93.75
Toe Spring Sole Rocker	Design Charecteristic "Forefoor Rocker"	% Frequency of ≥Agree	Design Charecteristic "Forefoor Rocker"	Relative %Frequency	Design Charecteristic "Forefoor Rocker"	Relative %Frequency
	"Stability footwear should have a reasonable forefoot rocker. "	52.94	Orginal Round 1:"Stability footwear should have a reasonable forefoot rocker."	26.6667	Modified Round 3: Stability footwear should have a reasonable forefoot rocker as a standard design. With forefoot rocker adaption prescriptions available to meet patient's needs.	56.25
			Modfied Round 2 "Stability footwear should come in a range of forefoot rockers dependent on the patient's condition and the stiffness of the sole."	73.3333	Orginal Round 2: "Stability footwear should come in a range of forefoot rockers dependent on the patient's condition and the stiffness of the sole."	43.75
			Design Charecteristic "Forefoor Rocker"	% Frequency of ≥Agree
			forefoot rocker: "Should allow adequate ground clearance in swing"	93.33
			Purpose of Design "Forefoor Rocker"	% Frequency of ≥Agree
			Forefoot rocker: "Should facilitate forward progression in terminal stance without impacting on stability"	93.33
	Design Charecteristic "Heel Rocker"	% Frequency of ≥Agree	Design Charecteristic "Heel Rocker"	Relative %Frequency
	"Stability footwear should have a heel rocker."	11.76	Orginal Round 1: "Stability footwear should have a heel rocker"	0
			Modfied Round 2: "Heel rockers should be offered as a sole adaption prescription dependent on the child's condition rather than a standard design of stability footwear."	100
Mass of Footwear	Design Charecteristic "Mass of Footwear"	% Frequency of ≥Agree	Design Charecteristic "Mass of Footwear"	% Frequency of ≥Agree	Design Charecteristic "Mass of Footwear"	% Frequency of ≥Agree
	"The weight of the stability footwear is an important consideration when issuing footwear to children with mobility impairment"	82.35
			"The mass of the shoe should be dependent on the mass and age of the child."	66.67	Original Round 2 "The mass of the shoe should be dependent on the mass and age of the child."	93.75
			"The mass of the shoe should be dependent on the child's stability needs."	80
			Purpose of Design "Mass of Footwear"	% Frequency of ≥Agree
			"Stability footwear should be the lowest reasonable mass to reduce physiological cost during mobility."	66.67	Original Round 2: "Stability footwear should be the lowest reasonable mass to reduce physiological cost during mobility."	100
			"increased mass: Assist stability in stance"	40	Orginal Round 2: increased mass: Assist stability in stance	68.75
			"increased mass: Assists pendular motion in swing"	26.67	Orginal Round 2: "increased mass Assists pendular motion in swing"	68.75
					Adverse Effect "Increased Mass of Footwear"	% Frequency of ≥Agree
					"Increased mass of the shoe may lead to difficulty in swing phase with ground clearance, navigating obstacles and stair climbing."	87.5
Other Considerations			Design Charecteristic "Last Dimensions"	% Frequency of ≥Agree
			"Children's stability footwear should be available in a range of last dimensions to accommodate different foot types."	93.33
			Design Charecteristic "Aesthetics"	% Frequency of ≥Agree
			"Children's Stability footwear should come in a range of colours and styles to appeal to children's aesthetics."	100
Text in Red Indicates: Consesus Statement ≥75% Relative Frequency ≥75% Panel ≥Agree
